# Supplementary material for: Assessing Procedural Justice in the Administration of Small-Scale Benthic Fisheries in Chile
Source: Frontiers journal article supplement (doi:10.3389/fmars.2021.636120), 2021-08-16
Supplement: Data_Sheet_2.PDF [file Data_Sheet_2.PDF]

## Supplementary Material

### Questionnaire

**Note:** The questionnaire was conducted in Spanish and has been translated into English to be included as supplementary material.

| 1. Selection of participants                                  |                                                                                                                                       |                        |
|---------------------------------------------------------------|---------------------------------------------------------------------------------------------------------------------------------------|------------------------|
| Procedures for selection of management committee participants |                                                                                                                                       | Likert scale: 1 to 7   |
| <i>a. Control</i>                                             | How much influence do fishers have on the selection of the people who are part of the management committee?<br><u>Comment:</u>        | <u>Numeric Answer:</u> |
| <i>b. Consistency</i>                                         | Are the procedures for the selection of representatives stable over time?<br><u>Comment:</u>                                          | <u>Numeric Answer:</u> |
| <i>c. Impartiality</i>                                        | Are the authorities impartial in the selection process of representatives?<br><u>Comment:</u>                                         | <u>Numeric Answer:</u> |
| <i>d. Decision Accuracy</i>                                   | Do stakeholders have information available to elect management committee representatives?<br><u>Comment:</u>                          | <u>Numeric Answer:</u> |
| <i>e. Correctability</i>                                      | Are stakeholders aware of how to appeal decisions if they consider that the procedures were not properly followed?<br><u>Comment:</u> | <u>Numeric Answer:</u> |
| <i>f. Ethicality</i>                                          | Do the authorities respect people's rights in the election of representatives?<br><u>Comment:</u>                                     | <u>Numeric Answer:</u> |

| 2. Setting ground rules                                                                                                                             |                                                                                                                      |                        |
|-----------------------------------------------------------------------------------------------------------------------------------------------------|----------------------------------------------------------------------------------------------------------------------|------------------------|
| Procedures for communicating to stakeholders the benefits associated with fisheries management and the decisions taken by the management committee. |                                                                                                                      | Likert scale: 1 to 7   |
| <i>a. Control</i>                                                                                                                                   | Are system stakeholders aware of the management committee decisions and benefits derived from it?<br><u>Comment:</u> | <u>Numeric Answer:</u> |
| <i>b. Consistency</i>                                                                                                                               | Is information to stakeholders about decisions delivered consistently over time?<br><u>Comment:</u>                  | <u>Numeric Answer:</u> |
| <i>c. Impartiality</i>                                                                                                                              | Are the authorities impartial in communicating decisions and benefits to stakeholders?<br><u>Comment:</u>            | <u>Numeric Answer:</u> |
| <i>d. Decision Accuracy</i>                                                                                                                         | Is the information provided to stakeholders of high quality?<br><u>Comment:</u>                                      | <u>Numeric Answer:</u> |
| <i>e. Correctability</i>                                                                                                                            | Are the mechanisms for communicating decisions and benefits evaluated and discussed?<br><u>Comment:</u>              | <u>Numeric Answer:</u> |
| <i>f. Ethicality</i>                                                                                                                                | Do the authorities communicate with respect and safeguard the rights of stakeholders?<br><u>Comment:</u>             | <u>Numeric Answer:</u> |

| 3. Gathering information                                                                  |                                                                                                                                      |                        |
|-------------------------------------------------------------------------------------------|--------------------------------------------------------------------------------------------------------------------------------------|------------------------|
| Procedures for the management committee to gather and use information for decision making |                                                                                                                                      | Likert scale: 1 to 7   |
| <i>a. Control</i>                                                                         | Does the management committee have influence in defining and generating relevant information for decision making?<br><u>Comment:</u> | <u>Numeric Answer:</u> |
| <i>b. Consistency</i>                                                                     | Does the management committee make decisions consistently with available information?<br><u>Comment:</u>                             | <u>Numeric Answer:</u> |
| <i>c. Impartiality</i>                                                                    | Are the authorities impartial in considering relevant information for decision making?<br><u>Comment:</u>                            | <u>Numeric Answer:</u> |
| <i>d. Decision Accuracy</i>                                                               | Does the management committee use the best available information for decision making?<br><u>Comment:</u>                             | <u>Numeric Answer:</u> |
| <i>e. Correctability</i>                                                                  | Is the quality of the information used for decision making discussed and evaluated in the management committee?<br><u>Comment:</u>   | <u>Numeric Answer:</u> |
| <i>f. Ethicality</i>                                                                      | Do the authorities use the available information considering the rights of stakeholders?<br><u>Comment:</u>                          | <u>Numeric Answer:</u> |

| 4. Decision structure                                                                                                       |                                                                                                                      |                        |
|-----------------------------------------------------------------------------------------------------------------------------|----------------------------------------------------------------------------------------------------------------------|------------------------|
| Procedures to define the structures and processes for reaching agreements and making decisions in the management committees |                                                                                                                      | Likert scale: 1 to 7   |
| <i>a. Control</i>                                                                                                           | How much influence do the representatives have in the Management Committee's decision making?<br><u>Comment:</u>     | <u>Numeric Answer:</u> |
| <i>b. Consistency</i>                                                                                                       | Are the decision-making mechanisms consistent over time?<br><u>Comment:</u>                                          | <u>Numeric Answer:</u> |
| <i>c. Impartiality</i>                                                                                                      | Are the authorities and representatives of the management committee impartial in decision-making?<br><u>Comment:</u> | <u>Numeric Answer:</u> |
| <i>d. Decision Accuracy</i>                                                                                                 | Does the management committee consistently make the best decisions?<br><u>Comment:</u>                               | <u>Numeric Answer:</u> |
| <i>e. Correctability</i>                                                                                                    | Are decisions made by the management committee corrected and their impact evaluated?<br><u>Comment:</u>              | <u>Numeric Answer:</u> |
| <i>f. Ethicality</i>                                                                                                        | Do the authorities respect the rights of participants in decision making?<br><u>Comment:</u>                         | <u>Numeric Answer:</u> |

| <b>5. Appeals</b>                                                                |                                                                                                                                           |                        |
|----------------------------------------------------------------------------------|-------------------------------------------------------------------------------------------------------------------------------------------|------------------------|
| Procedures for participants to impugn decisions made by the management committee |                                                                                                                                           | Likert scale: 1 to 7   |
| <i>a. Control</i>                                                                | How much influence do management committee representatives have in the procedures for resolving complaints or appeals?<br><u>Comment:</u> | <u>Numeric Answer:</u> |
| <i>b. Consistency</i>                                                            | Are the mechanisms for resolving complaints or appeals consistent over time?<br><u>Comment:</u>                                           | <u>Numeric Answer:</u> |
| <i>c. Impartiality</i>                                                           | Are the authorities impartial in resolving complaints or appeals?<br><u>Comment:</u>                                                      | <u>Numeric Answer:</u> |
| <i>d. Decision Accuracy</i>                                                      | complaints and appeals are resolved with the best information available?<br><u>Comment:</u>                                               | <u>Numeric Answer:</u> |
| <i>e. Correctability</i>                                                         | Are the representatives aware of the ways to challenge decisions on complaints and appeals?<br><u>Comment:</u>                            | <u>Numeric Answer:</u> |
| <i>f. Ethicality</i>                                                             | Do the authorities respect the rights of participants in the procedures for resolving complaints and appeals?<br><u>Comment:</u>          | <u>Numeric Answer:</u> |

| 6. Safeguards                                                                          |                                                                                                           |                        |
|----------------------------------------------------------------------------------------|-----------------------------------------------------------------------------------------------------------|------------------------|
| Procedures to ensure transparency and accountability in management committee decisions |                                                                                                           | Likert scale: 1 to 7   |
| <i>a. Control</i>                                                                      | How much influence do representatives have in the procedures to account for decisions?<br><u>Comment:</u> | <u>Numeric Answer:</u> |
| <i>b. Consistency</i>                                                                  | Are accountability mechanisms consistent over time?<br><u>Comment:</u>                                    | <u>Numeric Answer:</u> |
| <i>c. Impartiality</i>                                                                 | Are the authorities impartial in reporting on accountability?<br><u>Comment:</u>                          | <u>Numeric Answer:</u> |
| <i>d. Decision Accuracy</i>                                                            | Does accountability use the best available mechanisms?<br><u>Comment:</u>                                 | <u>Numeric Answer:</u> |
| <i>e. Correctability</i>                                                               | Are stakeholders aware of ways to challenge accountability?<br><u>Comment:</u>                            | <u>Numeric Answer:</u> |
| <i>f. Ethicality</i>                                                                   | Do the authorities respect the rights of stakeholders in accountability process?<br><u>Comment:</u>       | <u>Numeric Answer:</u> |

| 7. Change mechanisms                                                        |                                                                                                                             |                        |
|-----------------------------------------------------------------------------|-----------------------------------------------------------------------------------------------------------------------------|------------------------|
| Procedures for management committee members to modify decision making rules |                                                                                                                             | Likert scale: 1 to 7   |
| <i>a. Control</i>                                                           | How much influence do the representatives have on the Management Committee's rule and procedure changes?<br><u>Comment:</u> | <u>Numeric Answer:</u> |
| <i>b. Consistency</i>                                                       | Are the mechanisms for changing procedures consistent over time?<br><u>Comment:</u>                                         | <u>Numeric Answer:</u> |
| <i>c. Impartiality</i>                                                      | Are the authorities impartial in making changes to procedures?<br><u>Comment:</u>                                           | <u>Numeric Answer:</u> |
| <i>d. Decision Accuracy</i>                                                 | Is the best available information used to change procedures?<br><u>Comment:</u>                                             | <u>Numeric Answer:</u> |
| <i>e. Correctability</i>                                                    | Are stakeholders aware of the ways to challenge changes in procedures?<br><u>Comment:</u>                                   | <u>Numeric Answer:</u> |
| <i>f. Ethicality</i>                                                        | Do the authorities respect the rights of participants when changing procedures?<br><u>Comment:</u>                          | <u>Numeric Answer:</u> |
